# Supplementary material for: Inhibitory Effects of Diclofenac on Steroid Glucuronidation In Vivo Do Not Affect Hair-Based Doping Tests for Stanozolol
Source: MDPI journal article supplement (doi:10.3390/molecules22060976), 2017-06-12
Supplement: s1 [file s1]

**Table S1.** Effect sizes<sup>a</sup> for group differences at each sampling point

| Sample | Groups                   | Hair       |                     | Serum      |                     | Urine 1    |                     | Urine 2    |                     |
|--------|--------------------------|------------|---------------------|------------|---------------------|------------|---------------------|------------|---------------------|
|        |                          | Stanozolol | 3'Hydroxystanozolol | Stanozolol | 3'Hydroxystanozolol | Stanozolol | 3'Hydroxystanozolol | Stanozolol | 3'Hydroxystanozolol |
| S1     | partial $\eta^2$ (A,B,C) | BLLOQ      | BLLOQ               | 0.409*     | BLLOQ               | BLLOQ      | BLLOQ               | 0.242      | BLLOQ               |
|        | d (A-B)                  | -          | -                   | 1.720      |                     |            |                     | -          |                     |
|        | d (A-C)                  | -          | -                   | 2.513*     | BLLOQ               | BLLOQ      | BLLOQ               | -          | BLLOQ               |
|        | d (B-C)                  | -          | -                   | 0.785      |                     |            |                     | 0.923      |                     |
| S2     | partial $\eta^2$ (A,B,C) | 0.319      | 0.263               | 0.006      | 0.007               | 0.191      | 0.503*              | 0.126      | BLLOQ               |
|        | d (A-B)                  | 0.434      | 0.243               | 0.061      | 0.084               | 1.114      | 2.285*              | 0.737      | -                   |
|        | d (A-C)                  | 1.123      | 1.046               | 0.165      | 0.118               | 0.836      | 2.285*              | 0.333      | -                   |
|        | d (B-C)                  | 1.326      | 1.114               | 0.138      | 0.192               | 1.255      | -                   | 0.495      | -                   |
| S3     | partial $\eta^2$ (A,B,C) | 0.442*     | 0.261               | 0.004      | 0.093               | 0.296      | 0.146               | 0.003      | BLLOQ               |
|        | d (A-B)                  | 2.041*     | 0.549               | 0.108      | 0.217               | 0.212      | 0.971               | 0.007      | -                   |
|        | d (A-C)                  | 1.060      | 1.002               | 0.117      | 0.844               | 1.045      | 0.675               | 0.119      | -                   |
|        | d (B-C)                  | 0.935      | 1.138               | 0.008      | 0.437               | 1.639      | 0.129               | 0.154      | -                   |
| S4     | partial $\eta^2$ (A,B,C) | 0.238      | 0.285               | 0.182      | 0.439*              | 0.036      | BLLOQ               | 0.066      | BLLOQ               |
|        | d (A-B)                  | 0.013      | 0.598               | 0.777      | 1.155               | 0.536      | -                   | 0.267      | -                   |
|        | d (A-C)                  | 2.222      | 0.769               | 0.925      | 2.303*              | 0.234      | -                   | 0.320      | -                   |
|        | d (B-C)                  | 0.984      | 1.546               | 0.305      | 0.569               | 0.330      | -                   | 0.670      | -                   |
| S5     | partial $\eta^2$ (A,B,C) | 0.121      | 0.115               | 0.081      | 0.374               | 0.109      | BLLOQ               | 0.067      | BLLOQ               |
|        | d (A-B)                  | 0.456      | 0.861               | 0.775      | 1.587               | 0.370      | -                   | 0.355      | -                   |
|        | d (A-C)                  | 0.938      | 0.310               | 0.110      | 0.865               | 0.443      | -                   | 0.215      | -                   |
|        | d (B-C)                  | 0.320      | 0.431               | 0.488      | 0.982               | 0.783      | -                   | 0.733      | -                   |
| S6     | partial $\eta^2$ (A,B,C) | 0.056      | 0.036               | 0.207      | 0.202               | 0.139      | BLLOQ               | BLLOQ      | BLLOQ               |
|        | d (A-B)                  | 0.383      | 0.377               | 0.461      | 1.003               | -          | -                   | -          | -                   |
|        | d (A-C)                  | 0.185      | 0.119               | 1.139      | 1.145               | 0.910      | -                   | -          | -                   |
|        | d (B-C)                  | 0.523      | 0.494               | 0.810      | 0.832               | 0.910      | -                   | -          | -                   |

<sup>a</sup>Partial eta squared ( $\eta^2$ ) was calculated by SPSS. Cohen's  $|d|$  were calculated from group means and their respective SD. \* denotes statistically significant difference. Group A: 5 mg/kg stanozolol only, Group B: 5 mg/kg stanozolol + 1 mg/kg diclofenac, Group C: 5 mg/kg stanozolol + 5 mg/kg diclofenac. BLLOQ: below lower limit of quantification, which was found to be 0.125 ng/mL for stanozolol and 0.25 ng/mL for 3'-hydroxystanozolol in urine; and 0.5 pg/mg for both analytes in hair, and 0.25 ng/mL for both analytes in serum.

**Table S2.** Test sensitivity

|         |                     |         | <b>S1</b>       | <b>S2</b>        | <b>S3</b>        | <b>S4</b>        | <b>S5</b>        | <b>S6</b>        |
|---------|---------------------|---------|-----------------|------------------|------------------|------------------|------------------|------------------|
| Hair    | Stanozolol          | Group A | 6/6             | 0/6              | 0/6              | 1/5              | 0/6              | 0/6              |
|         |                     | Group B | 6/6             | 0/5              | 0/5              | 0/5              | 0/5              | 0/4              |
|         |                     | Group C | 6/6             | 0/6              | 0/6              | 0/5              | 0/5              | 0/6              |
|         | Test sensitivity    |         | 0%              | 100%             | 100%             | 93.3%            | 100%             | 100%             |
|         |                     |         | (0.0% - 18.7%)  | (81.3% - 100.0%) | (81.3% - 100.0%) | (68.0% - 99.0%)  | (79.2% - 100.0%) | (75.7% - 100.0%) |
|         | 3'hydroxystanozolol | Group A | 6/6             | 0/6              | 0/6              | 1/5              | 3/6              | 2/6              |
|         |                     | Group B | 6/6             | 0/4              | 0/5              | 0/5              | 1/5              | 1/4              |
|         |                     | Group C | 6/6             | 0/6              | 0/6              | 0/5              | 3/5              | 2/6              |
|         | Test sensitivity    |         | 0%              | 100%             | 100%             | 93.3%            | 56.2%            | 68.8%            |
|         |                     |         | (0.0% - 18.7%)  | (75.7% - 100.0%) | (80.3% - 100.0%) | (68.0% - 99.0%)  | (29.9% - 80.2%)  | (35.12% - 87.1%) |
| Serum   | Stanozolol          | Group A | 3/6             | 0/6              | 0/5              | 0/6              | 0/5              | 0/3              |
|         |                     | Group B | 0/6             | 0/5              | 0/5              | 0/5              | 0/5              | 0/2              |
|         |                     | Group C | 0/6             | 0/5              | 0/6              | 0/6              | 1/5              | 0/4              |
|         | Test sensitivity    |         | 83.3%           | 100%             | 100%             | 100%             | 93.3%            | 100%             |
|         |                     |         | (58.6% - 96.2%) | (79.2%- 100.0%)  | (79.2%- 100.0%)  | (78.0% - 100.0%) | (68.0 % - 99.0%) | (66.2% - 100.0%) |
|         | 3'hydroxystanozolol | Group A | 6/6             | 0/6              | 0/5              | 0/6              | 0/5              | 2/3              |
|         |                     | Group B | 6/6             | 0/5              | 0/5              | 0/5              | 0/5              | 0/2              |
|         |                     | Group C | 6/6             | 0/5              | 0/6              | 0/6              | 0/5              | 0/4              |
|         | Test sensitivity    |         | 0%              | 100%             | 100%             | 100%             | 100%             | 77.8%            |
|         |                     |         | (0.0% - 18.7%)  | (79.2%- 100.0%)  | (79.2%- 100.0%)  | (80.3% - 100.0%) | (78.0 - 100.0%)  | (40.1% - 96.5%)  |
| Urine 1 | Stanozolol          | Group A | 6/6             | 0/6              | 0/6              | 0/6              | 0/6              | 6/6              |
|         |                     | Group B | 5/5             | 1/5              | 0/5              | 0/5              | 0/5              | 5/5              |
|         |                     | Group C | 6/6             | 0/6              | 0/6              | 0/6              | 0/6              | 4/6              |
|         | Test sensitivity    |         | 0%              | 94.1%            | 100%             | 100%             | 100%             | 11.8%            |
|         |                     |         | (0.0% to 19.7%) | (71.2% - 99.0%)  | (80.3% - 100.0%) | (80.3% - 100.0%) | (80.3% - 100.0%) | (1.8% - 36.5%)   |
|         | 3'hydroxystanozolol | Group A | 6/6             | 0/6              | 2/6              | 6/6              | 6/6              | 6/6              |
|         |                     | Group B | 5/5             | 5/5              | 4/5              | 5/5              | 5/5              | 5/5              |
|         |                     | Group C | 6/6             | 6/6              | 5/6              | 6/6              | 6/6              | 6/6              |
|         | Test sensitivity    |         | 0%              | 35.3%            | 35.3%            | 0%               | 0%               | 0%               |
|         |                     |         | (0.0% to 19.7%) | (14.3% - 61.6%)  | (14.3% - 61.6%)  | (0.0% to 19.7%)  | (0.0% to 19.7%)  | (0.0% to 19.7%)  |

Table S2. *Cont.*

|         |                     |                  |                 |                  |                 |                  |                 |                 |
|---------|---------------------|------------------|-----------------|------------------|-----------------|------------------|-----------------|-----------------|
| Urine 2 | Stanozolol          | Group A          | 6/6             | 0/6              | 1/6             | 0/6              | 2/6             | 6/6             |
|         |                     | Group B          | 4/5             | 0/5              | 0/5             | 0/5              | 2/5             | 5/5             |
|         |                     | Group C          | 3/6             | 0/6              | 0/6             | 0/6              | 1/6             | 6/6             |
|         |                     | Test sensitivity | 23.5%           | 100%             | 94.1%           | 100%             | 70.6%           | 0%              |
|         |                     |                  | (6.7% - 49.9%)  | (80.3% - 100.0%) | (71.2% - 99.0%) | (80.3% - 100.0%) | (44.0% - 89.6%) | (0.0% to 19.7%) |
|         | 3'hydroxystanozolol | Group A          | 6/6             | 6/6              | 6/6             | 6/6              | 6/6             | 6/6             |
|         |                     | Group B          | 5/5             | 5/5              | 5/5             | 5/5              | 5/5             | 5/5             |
|         |                     | Group C          | 6/6             | 6/6              | 6/6             | 6/6              | 6/6             | 6/6             |
|         |                     | Test sensitivity | 0%              | 0%               | 0%              | 0%               | 0%              | 0%              |
|         |                     |                  | (0.0% to 19.7%) | (0.0% to 19.7%)  | (0.0% to 19.7%) | (0.0% to 19.7%)  | (0.0% to 19.7%) | (0.0% to 19.7%) |

Test sensitivity is calculated for each sampling point for the pooled samples as true positives / (true positives + false negatives); 96%CI displayed in brackets. The ratio in each cell shows the number of false negatives over the total number of positive samples
